# 1 Heat-treated virus inactivation rate depends strongly on 2 treatment procedure: illustration with SARS-CoV-2

3 Amandine Gamble<sup>1,\*</sup>, Robert J. Fischer<sup>2,\*</sup>, Dylan H. Morris<sup>3</sup>, Kwe Claude Yinda<sup>2</sup>, Vincent J. Munster<sup>2</sup>, and  
4 James O. Lloyd-Smith<sup>1</sup>

5 <sup>1</sup>*Department of Ecology & Evolutionary Biology, University of California, Los Angeles, CA, USA*

6 <sup>2</sup>*Laboratory of Virology, National Institute of Allergy and Infectious Diseases, Hamilton, MT, USA*

7 <sup>3</sup>*Department of Ecology & Evolutionary Biology, Princeton University, NJ, USA*

8 *\*Amandine Gamble and Robert J. Fischer contributed equally to this work. Author order was determined in order of increasing  
9 seniority.*

10 Correspondence: Amandine Gamble, [amandine.gamble@gmail.com](mailto:amandine.gamble@gmail.com)

11 Running title: Heat treatment for virus inactivation

## 12 **Abstract**

13 Decontamination helps limit environmental transmission of infectious agents. It is required for  
14 the safe re-use of contaminated medical, laboratory and personal protective equipment, and for  
15 the safe handling of biological samples. Heat treatment is a common decontamination method,  
16 notably used for viruses. We show that for liquid specimens (here, solution of SARS-CoV-2 in cell  
17 culture medium), virus inactivation rate under heat treatment at 70°C can vary by almost two  
18 orders of magnitude depending on the treatment procedure, from a half-life of 0.86 min (95%  
19 credible interval: [0.09, 1.77]) in closed vials in a heat block to 37.00 min ([12.65, 869.82]) in  
20 uncovered plates in a dry oven. These findings suggest a critical role of evaporation in virus  
21 inactivation via dry heat. Placing samples in open or uncovered containers may dramatically  
22 reduce the speed and efficacy of heat treatment for virus inactivation. Given these findings, we  
23 reviewed the literature temperature-dependent coronavirus stability and found that specimen

24 containers, and whether they are closed, covered, or uncovered, are rarely reported in the  
25 scientific literature. Heat-treatment procedures must be fully specified when reporting  
26 experimental studies to facilitate result interpretation and reproducibility, and must be carefully  
27 considered when developing decontamination guidelines.

## 28 **Importance**

29 Heat is a powerful weapon against most infectious agents. It is widely used for decontamination  
30 of medical, laboratory and personal protective equipment, and for biological samples. There are  
31 many methods of heat treatment, and methodological details can affect speed and efficacy of  
32 decontamination. We applied four different heat-treatment procedures to liquid specimens  
33 containing SARS-CoV-2. Our results show that the container used to store specimens during  
34 decontamination can substantially affect inactivation rate: for a given initial level of  
35 contamination, decontamination time can vary from a few minutes in closed vials to several  
36 hours in uncovered plates. Reviewing the literature, we found that container choices and heat  
37 treatment methods are only rarely reported explicitly in methods sections. Our study shows that  
38 careful consideration of heat-treatment procedure — in particular the choice of specimen  
39 container, and whether it is covered — can make results more consistent across studies, improve  
40 decontamination practice, and provide insight into the mechanisms of virus inactivation.

## 41 **Keywords**

42 Environmental stability, environmental persistence, decontamination, temperature, heat  
43 treatment, coronavirus

## 44 **Introduction**

45 The COVID-19 pandemic has led to millions of infections worldwide via multiple modes of  
46 transmission. Transmission is thought to occur via respiratory particles expelled by individuals  
47 infected by the causative virus, SARS-CoV-2 [1–3]. Epidemiological investigations that  
48 environmental transmission of SARS-CoV-2 occurs [4]; this is possible because the virus remains  
49 stable for a period of time on inert surfaces and in aerosols [5, 6]. Environmental transmission  
50 has been suspected or demonstrated for many other viruses, including hepatitis viruses [7],  
51 noroviruses [8], and influenza viruses [9] among others. Rapid and effective decontamination  
52 methods can help limit environmental transmission during infectious disease outbreaks.

53 Heat treatment is a widely-used decontamination method, notably used for viruses [10]. It is  
54 thought to inactivate viruses principally by denaturing the secondary structures of proteins and  
55 other molecules, resulting in impaired molecular function [11]. Heat is used to decontaminate  
56 various materials, such as personal protective equipment (PPE), examination and surgical tools,  
57 culture and transportation media, and biological samples [12–15]. The United States Centers for  
58 Disease Control and Prevention recommends moist heat as a SARS-CoV-2 inactivation method  
59 [16].

60 In this context, multiple studies have evaluated the effectiveness of heat to inactivate  
61 coronaviruses on various household surfaces, PPE, culture and transportation media, and blood  
62 products [14, 17–22]. Heat-based decontamination procedures are also used for many other  
63 viruses, including hepatitis viruses [23], influenza viruses [24], parvoviruses [25], and human  
64 immunodeficiency viruses [26].

65 There are multiple ways to apply heat treatment. Heat can be dry or moist. Heating implements  
66 can differ in degree of heat transfer: for example, heat blocks in theory allow more efficient heat

67 transfer than ovens, so samples should more rapidly reach and better maintain the target  
68 temperature. Different levels of evaporation may be permitted: for example, samples deposited  
69 on flat surfaces or contained in open plates will evaporate more than those in closed vials; both  
70 types of container are commonly-used. Local temperature and humidity impact virus inactivation  
71 rates by affecting molecular interactions and solute concentration [27]. It follows that factors  
72 such as heat transfer and evaporation, which determine solute concentration and alter micro-  
73 environment temperature through evaporative cooling, could modulate virus inactivation rates  
74 just as ambient temperature does.

75 We assessed the impact of heat-treatment procedure on SARS-CoV-2 inactivation. We studied dry  
76 heat treatment applied to a liquid specimen (virus suspension in cell culture medium), keeping  
77 temperature constant (at 70°C) but allowing different degrees of heat transfer (using a dry oven  
78 or a heat block) and evaporation (placing samples in closed vials, covered plates or uncovered  
79 plates). We then compared the half-lives of SARS-CoV-2 under these different procedures. In light  
80 of our results, we reviewed the literature to assess whether heat-treatment procedure  
81 descriptions are detailed enough to allow replication and inter-study comparison. We focused  
82 our literature review on coronavirus inactivation.

## 83 **Results and Discussion**

### 84 **Estimation of SARS-CoV-2 half-life under four distinct heat-treatment** 85 **procedures**

86 We prepared a solution of cell culture medium containing SARS-CoV-2, and exposed it to 70°C  
87 heat using four different procedures: (1) an uncovered 24-well plate, (2) a covered 24-well plate  
88 (using an unsealed plastic lid), (3) a set of closed 2 mL vials in a dry oven, and (4) a set of closed 2  
89 mL vials in a heat block containing water (Fig. 1A). The inactivation rate of SARS-CoV-2 differed

90 sharply across procedures. There were large differences in the time until the virus dropped  
91 below detectable levels, despite comparable initial quantities of virus (estimated mean initial  
92 titer ranging from 4.5 [4.1, 5.0]  $\log_{10}$  TCID<sub>50</sub>/mL for the uncovered plate in an oven to 5.0 [4.7, 5.5]  
93 for the closed vials in a heat block, Fig. 1B). We could not detect viable virus in the medium after  
94 30 min of treatment (the earliest time-point) in closed vials heated either in a heat block or in a  
95 dry oven; we could not detect viable virus after 90 min in covered plates (Fig. 1B). In uncovered  
96 plates, we observed a reduction of viral titer of approximately 1  $\log_{10}$  TCID<sub>50</sub>/mL after 60 min.  
97 Because macroscopic evaporation was observed in the uncovered plates and was almost  
98 complete at 60 min, all the samples were complemented to 1 mL with deionized water at  
99 collection. Hence, the slower decrease in viral titer observed in uncovered plates (and, to a lesser  
100 extent, in covered plates compared to closed vials) can only be explained by a slower inactivation  
101 rate, not by virus concentration due to evaporation.

102 Using a Bayesian regression model, we estimated inactivation rates from the experimental data  
103 and converted them to half-lives to compare the four procedures. SARS-CoV-2 inactivation in  
104 solution was most rapid in closed vials, using either a heat block or a dry oven (half-lives of 0.86  
105 [0.09, 1.77] and 1.91 [0.10, 1.99] min, respectively), compared to the other treatment procedures  
106 (Fig. 2; [Supplemental Material](#), Table 1). Inactivation rate was intermediate in covered plates  
107 (half-life of 3.94 [3.12, 5.01] min) and considerably slower in uncovered plates (37.04 [12.65,  
108 869.82] min).

109 The rapid virus inactivation rate seen in closed vials subject to dry heat at 70°C agrees with  
110 previously reported results for inactivation of SARS-CoV-2 in virus transportation medium [28],  
111 SARS-CoV-1 in human serum [17], and MERS-CoV [18] and canine coronavirus in cell culture  
112 medium [21], among other results. All showed a loss of infectivity on the order of  $10^{4-6}$  TCID<sub>50</sub>

113 after 5–10 min at 65–75°C. None of these studies report sufficient details on their protocol to  
114 indicate which of our tested procedures corresponds most closely to their approach.  
115 These results have critical implications for real-world heat treatment decontamination practices.  
116 Inactivation rates reported in studies that use closed vials may dramatically underestimate the  
117 time needed to decontaminate a piece of equipment (uncovered) in a dry oven. We have  
118 previously estimated the half-life of SARS-CoV-2 on stainless steel and N95 fabric when exposed  
119 to 70°C using a dry oven, without a container to limit evaporation. We found half-lives of  
120 approximately 9 and 5 min, respectively [14]. These values are on the same order of magnitude  
121 as the half-life of the virus in bulk solution exposed to heat treatment in a covered plate (3.94  
122 [3.12, 5.01] min), and considerably longer than the half-life of the virus exposed to heat treatment  
123 in bulk solution in a closed vial. Inactivation rates reported by studies conducted in closed vials  
124 should not be used to directly inform decontamination guidelines of pieces of equipment that  
125 cannot be treated using the same exact procedure.

## 126 **The potential role of evaporation in virus inactivation**

127 The fact that containers that allow more air-flow are associated with slower virus inactivation  
128 suggests that evaporation may play a critical role in determining the rate of virus inactivation  
129 during dry heat treatment. There are several mechanisms by which evaporation could impact the  
130 effectiveness of heat treatment for virus inactivation. First, evaporation could induce a local drop  
131 in temperature due to the enthalpy of vaporization of water (or evaporative cooling), limiting the  
132 effect of the heat itself. This hypothesis could be verified in future studies by measuring sample  
133 temperature (instead of ambient temperature) using a thermocouple. Second, evaporation could  
134 lead to modifications of the virion's solute environment: solutes become more concentrated as  
135 the solvent evaporates, and under certain conditions efflorescence (i.e. crystal formation) can  
136 occur [29]. Mechanistic modeling of virus inactivation data shows that increased solute

137 concentration increases virus inactivation rate, but efflorescence decreases inactivation rate [27].  
138 Our results show that greater degrees of evaporation during dry heat treatment are associated  
139 with slower virus inactivation. This suggests that evaporative cooling, efflorescence, or both may  
140 drive lower inactivation rates in closed containers. This could help explain why low ambient  
141 humidity levels lead to slow inactivation at high temperatures [30], as low humidity levels allow  
142 for more evaporation and possibly efflorescence. The potential role of evaporation as a key  
143 modulator of virus inactivation rate is supported by the known importance of other factors that  
144 affect evaporation, such as relative humidity [27, 29] and medium composition [20, 31]. We  
145 postulate that container shape and surface area to volume ratio will also play a role, as these  
146 should also impact the evaporative dynamics. Heat transfer efficiency may also play a role in  
147 determining the rate of virus inactivation using dry heat, but our data do not provide evidence for  
148 or against this hypothesis, since virus inactivation was extremely rapid in closed vials regardless  
149 of whether they were exposed to heat using a dry oven or a heat block.  
150 Our study focuses exclusively on the effect of temperature on virus inactivation. Other factors can  
151 affect virus inactivation rate in liquid specimens, for example the composition of the suspension  
152 medium [20, 29, 32]. In particular, proteins are thought to have a protective effect on virus  
153 viability, while the effect of salts and pH depends on other factors such as ambient humidity [33].  
154 We consider these only implicitly, insofar as they are affected by evaporation. The role of medium  
155 composition will be especially important to consider in future studies, as the composition of  
156 biological fluids, usually targeted by decontamination procedures, differs greatly from that of cell  
157 culture media. In addition, the impact of heat treatment procedure on inactivation rate may differ  
158 across microbes. Enveloped and non-enveloped viruses may behave differently from each other,  
159 and bacteria may behave differently from viruses [29]. In particular, non-enveloped viruses are  
160 generally more stable than enveloped viruses [34], but very few studies have focused on thermal

161 sensitivity [35]. Finally, decontamination procedures must consider not only the effectiveness  
162 and speed of pathogen inactivation but also the potential impact of the procedure on the integrity  
163 of the decontaminated equipment or specimen. This is particularly important for PPE and for  
164 biological samples [14, 36, 37].

165 Given the substantial effect of heat-treatment procedure on virus inactivation rates, it is critical to  
166 specify procedures precisely when comparing inactivation rates between studies or producing  
167 guidelines for decontamination. In particular, our results show that protocols that use open  
168 containers or uncovered surfaces lead to much slower viral inactivation, at least in bulk medium.  
169 For instance, the fact that Chin et al. 2020 [28] used closed vials to quantify SARS-CoV-2 half-life  
170 (personal communications) likely gave rise to outliers observed at 56 and 70°C relative to  
171 predicted relationships parameterized from uncovered surfaces [27]. If meta-analyses of the  
172 effect of temperature on virus inactivation were to integrate together data collected following  
173 different procedures, without corrections, they may lead to false conclusions.

#### 174 **Reporting of heat-treatment procedures in the literature**

175 Given these findings, we conducted a literature review in order to assess whether heat treatment  
176 procedures for coronaviruses were reported with sufficient details to allow reproducibility and  
177 appropriate interpretation of results. Our literature review identified 41 studies reporting the  
178 effect of temperature on coronavirus stability (Fig. S1), covering 12 coronavirus species and  
179 temperature ranging from -70 to 100°C (Table. S1). Among those 41 studies, just 14 included any  
180 information about the containers used, and 5 specified whether containers were closed. Only a  
181 single study reported container type and container closure explicitly for all experimental  
182 conditions [38]. When the information was available, studies of virus stability in bulk liquid  
183 medium were always conducted in vials [6, 20, 21, 38–45]. Studies interested in virus stability on  
184 surfaces were conducted in vials, in well plates [46] or trays [47], or on surface coupons placed in



185 vials [39] or placed directly on oven rack (personal communication [14]). When specified, vial  
186 volume ranged from 1.5 mL to 50 mL [21, 40, 42], and sample volume from 0.001 to 45 mL.  
187 Finally, 24 studies included some information about how target temperature (and, in some cases,  
188 humidity) conditions were created. Methods included water baths [17, 19, 20, 38, 42, 44, 45, 48,  
189 49], heat blocks [40, 43, 50], incubators [30, 47, 51–54], ovens [14], refrigerators [55–57],  
190 isothermal boxes [56], and boxes with saturated salt solutions [58].

191 This literature review reveals that a variety of setups are used to hold samples and control  
192 environmental conditions for virus stability and inactivation experiments. Unfortunately, it also  
193 reveals that the vast majority of studies of heat treatment for virus inactivation do not report the  
194 exact procedures under which the samples were exposed to heat (in particular whether they  
195 were in closed, covered, or uncovered containers). This makes it difficult to compare inactivation  
196 rates among studies, and risky to use estimates from the literature to inform decontamination  
197 guidelines. More generally, given the potentially large effects of treatment procedure and  
198 ambient environment on virus inactivation rate, we recommend that decontamination  
199 procedures be validated specifically for the setup to be used, rather than based on inactivation  
200 rate estimates from the literature, especially if experimental protocols are unclear.

## 201 **Conclusion and Perspectives**

202 Using SARS-CoV-2 as an illustration, we demonstrate that the choice of heat-treatment procedure  
203 has a considerable impact on virus inactivation rates in liquid specimens. Our findings highlight  
204 the need to better understand the mechanisms controlling inactivation rate, including the role of  
205 evaporation. This will require comparative studies including a set of diverse microbes exposed to  
206 heat treatment in different conditions likely to impact evaporation dynamics and/or microbe  
207 thermal stability, ideally paired with high-resolution physical measurements. These conditions

208 include container sealing, but also sample volume and evaporation surface, medium composition,  
209 container material, and heating system. In the meantime, any effort to compare or translate  
210 inactivation rates (or even relative patterns) from one setting to another should be undertaken  
211 cautiously, accounting for these factors. In particular, as decontamination time can vary by  
212 several orders of magnitude across procedures, these factors should be considered when  
213 developing decontamination guidelines. Finally, we also call for more thorough description of  
214 experimental protocols in scientific publications, for instance through the publication of detailed  
215 protocols in online repositories [59], or peer-reviewed journals publishing laboratory protocols.  
216 Better understanding the impact of temperature and humidity on virus inactivation is critical not  
217 only for designing efficient decontamination protocols but also for predicting virus  
218 environmental persistence, with consequences for real-world transmission [27, 60, 61].

## 219 **Material and Methods**

### 220 **Laboratory experiments**

221 We used SARS-CoV-2 strain HCoV-19 nCoV-WA1-2020 (MN985325.1) [62] for all our  
222 experiments. We prepared a solution of SARS-CoV-2 in Dulbecco's Modified Eagle Medium cell  
223 culture medium (Sigma-Aldrich, reference D6546) supplemented with 2 nM L-glutamine, 2%  
224 fetal bovine serum and 100 units/mL penicillin/streptomycin. For each of the four heat-  
225 treatment procedures considered, we placed samples of 1 mL of this solution in plate wells or  
226 vials before heat treatment. This relatively low volume was chosen to allow the samples to reach  
227 70°C quickly. The plates were 24-well flat-bottom plates made of crystalline polystyrene with an  
228 inner diameter of 15.6 mm (Corning Costar), and 2 mL screw-top vials made of polypropylene  
229 with an inner diameter of 10.8 mm diameter (Sarstedt). Both materials have a similar thermal  
230 conductivity (0.1-0.13 and 0.1-0.22, respectively, at 23°C) and thickness (about 0.05 mm). The

231 plates and tubes were then placed into either a gene hybridization dry oven or a heat block with  
232 water in the wells (Fig. 1A). The large rotating ferris wheel-like apparatus of the gene  
233 hybridization oven ensured air mixing during the experiments, preventing a build-up of humid  
234 air above the open wells.

235 Samples were removed at 10, 20, 30 and 60 min from the uncovered 24-well plate, or at 30, 60  
236 and 90 min for the three other procedures. We took a 0 min time-point measurement prior to  
237 exposing the specimens to the heat treatment. As evaporation was observed after exposure to  
238 heat, all the samples were complemented to 1 mL with deionized water at collection in order to  
239 re-hydrate the suspension medium and recover virions with the same efficiency across all  
240 treatments. At each collection time-point, samples were transferred into a vial and frozen at -80°C  
241 until titration (or directly frozen for experiments conducted in vials). Note that all the samples  
242 were kept frozen for 8 days and subject to one freeze-thaw cycle, which may have some (limited)  
243 impact on absolute virus titer [63, 64], but not on the estimated inactivation rate (since this  
244 depends on relative titers across samples). We performed three replicates for each inactivation  
245 procedure. Samples were not exposed to direct sunlight during the experiment.

246 We quantified viable virus contained in the collected samples by end-point titration as described  
247 previously [14]. Briefly, Vero E6 cells were plated the day before carrying out titration. After 24  
248 hours, the cells had reached a confluency of about 85-90% and were inoculated with 10-fold  
249 serial dilutions of sample in quadruplicates. One hour after inoculation, inoculum was removed  
250 and replaced with 100µL of supplemented DMEM. Six days after inoculation, each well was  
251 observed for cytopathogenic effects and classified as infected or non-infected.

## 252 **Statistical analyses**

253 We quantified the inactivation rate of SARS-CoV-2 in a solution following different heat-treatment  
254 procedures by adapting a Bayesian approach described previously [14]. Briefly, we inferred virus  
255 titers from raw endpoint titration well data (infected / non-infected) by modeling well infections  
256 as a Poisson single-hit process [65]. Then, we estimated the decay rates of viable virus titer using  
257 a regression model. This modeling approach allowed us to account for differences in initial virus  
258 titers (0 min time-point) across samples as well as other sources of experimental noise. The  
259 model yields posterior distributions for the virus inactivation rate under each of the treatment  
260 procedures—that is, estimates of the range of plausible values for each of these parameters given  
261 our data, with an estimate of the overall uncertainty [66]. We then calculated half-lives from the  
262 estimated inactivation rates. We analyzed data obtained under different treatment procedures  
263 separately. We placed weakly informative prior distributions on mean initial virus titers and log  
264 virus half-lives. The complete model is detailed in the [Supplemental Material](#).

265 We estimated virus titers and model parameters by drawing posterior samples using Stan [67],  
266 which implements a No-U-Turn Sampler (a form of Markov Chain Monte Carlo), via its R interface  
267 RStan. We report estimated titers and model parameters as the median [95% credible interval] of  
268 their posterior distribution. We assessed convergence by examining trace plots and confirming  
269 sufficient effective sample sizes and  $\hat{R}$  values for all parameters. We confirmed appropriateness  
270 of prior distributions with prior predictive checks and assessed goodness of fit by plotting  
271 regression lines against estimated titers and through posterior predictive checks (SI, Fig. [S2-S4](#)).

## 272 **Literature review**

273 We screened the Web of Science Core Collection database on December 28, 2020 using the  
274 following key words: “coronavir\* AND (stability OR viability OR inactiv\*) AND (temperature OR

275 heat OR humidity)” (190 records). We also considered opportunistically found publications (23  
276 records). We then selected the studies reporting original data focused on the effect of  
277 temperature on coronavirus inactivation obtained in experimental conditions (Fig. S1). For each  
278 selected study, we recorded information on virus, suspension medium, container, incubator,  
279 temperature and humidity (Table S1).

## 280 **Data accessibility**

281 Compiled literature data as well as code and data to reproduce the Bayesian estimation results  
282 and corresponding figures are available on Github: [https://github.com/dylanhmorris/heat-](https://github.com/dylanhmorris/heat-inactivation)  
283 [inactivation](https://github.com/dylanhmorris/heat-inactivation) [68]

## 284 **Supplemental Material file list**

285 Supplemental file 1 - Supplemental text, tables (Table S1) and figures (Figures S1-S4). PDF  
286 file

## 287 **Acknowledgments**

288 We thank Linsey C. Marr for helpful discussions. This research was supported by the Intramural  
289 Research Program of the National Institute of Allergy and Infectious Diseases (NIAID), National  
290 Institutes of Health (NIH). JOL-S, AG, and DHM were supported by the Defense Advanced  
291 Research Projects Agency DARPA PREEMPT (D18AC00031), JOL-S and AG were supported by the  
292 UCLA AIDS Institute and Charity Treks, and JOL-S was supported by the U.S. National Science  
293 Foundation (DEB-1557022), the Strategic Environmental Research and Development Program  
294 (SERDP, RC-2635) of the U.S. Department of Defense. The content of the article does not  
295 necessarily reflect the position or the policy of the US government, and no official endorsement  
296 should be inferred.

## 297   **References**

- 298   1.   Ong, S. W. X. *et al.* Air, Surface Environmental, and Personal Protective Equipment  
299       Contamination by Severe Acute Respiratory Syndrome Coronavirus 2 (SARS-CoV-2) from a  
300       Symptomatic Patient. *JAMA* (2020).
- 301   2.   Cai, J. *et al.* Indirect Virus Transmission in Cluster of COVID-19 Cases, Wenzhou, China,  
302       2020. *Emerging Infectious Diseases* **26** (2020).
- 303   3.   Kwon, K.-S. *et al.* Evidence of Long-Distance Droplet Transmission of SARS-CoV-2 by Direct  
304       Air Flow in a Restaurant in Korea. *Journal of Korean medical science* **35**  
305       (2020).
- 306   4.   Azimi, P., Keshavarz, Z., Laurent, J. G. C., Stephens, B. & Allen, J. G. Mechanistic transmission  
307       modeling of COVID-19 on the Diamond Princess cruise ship demonstrates the importance of  
308       aerosol transmission. *Proceedings of the National Academy of Sciences* **118** (2021).
- 309   5.   van Doremalen, N. *et al.* Aerosol and Surface Stability of SARS-CoV-2 as Compared with  
310       SARS-CoV-1. *New England Journal of Medicine*, NEJMc2004973 (2020).
- 311   6.   Matson, M. J. *et al.* Effect of Environmental Conditions on SARS-CoV-2 Stability in Human  
312       Nasal Mucus and Sputum. *Emerging Infectious Diseases* **26** (2020).
- 313   7.   Pfaender, S. *et al.* Environmental Stability and Infectivity of Hepatitis C Virus (HCV) in  
314       Different Human Body Fluids. *Frontiers in microbiology* **9**, 504 (2018).
- 315   8.   Lopman, B. *et al.* Environmental Transmission of Norovirus Gastroenteritis. *Current opinion*  
316       *in virology* **2**, 96–102 (2012).
- 317   9.   Brebán, R., Drake, J. M., Stallknecht, D. E. & Rohani, P. The Role of Environmental  
318       Transmission in Recurrent Avian Influenza Epidemics. *PLoS computational biology* **5**,  
319       e1000346 (2009).

- 320 10. Rogers, W. in *Sterilisation of Biomaterials and Medical Devices* 20–55 (Elsevier, 2012).
- 321 11. Wigginton, K. R., Pecson, B. M., Sigstam, T., Bosshard, F. & Kohn, T. Virus Inactivation  
322 Mechanisms: Impact of Disinfectants on Virus Function and Structural Integrity.  
323 *Environmental Science & Technology* **46**, 12069–12078 (2012).
- 324 12. Chang, L., Yan, Y. & Wang, L. Coronavirus disease 2019: coronaviruses and blood safety.  
325 *Transfusion medicine reviews* **34**, 75–80 (2020).
- 326 13. Henwood, A. F. Coronavirus disinfection in histopathology. *Journal of Histotechnology* **43**,  
327 102–104 (2020).
- 328 14. Fischer, R. J. *et al.* Effectiveness of N95 Respirator Decontamination and Reuse against SARS-  
329 CoV-2 Virus. *Emerging Infectious Diseases* **26**, 2253 (2020).
- 330 15. Heimbuch, B. K. *et al.* A Pandemic Influenza Preparedness Study: Use of Energetic Methods  
331 to Decontaminate Filtering Facepiece Respirators Contaminated with H1N1 Aerosols and  
332 Droplets. *American Journal of Infection Control* **39**, 265–270 (2011).
- 333 16. Centers for Disease Control and Prevention. *Implementing Filtering Facepiece Respirator*  
334 *(FFR) Reuse, Including Reuse after Decontamination, When There Are Known Shortages of*  
335 *N95 Respirators* 2020.
- 336 17. Darnell, M. E. R. & Taylor, D. R. Evaluation of Inactivation Methods for Severe Acute  
337 Respiratory Syndrome Coronavirus in Noncellular Blood Products. *Transfusion* **46**, 1770–  
338 1777 (2006).
- 339 18. Leclercq, I., Bat´ejat, C., Burgui`ere, A. M. & Manuguerra, J.-C. Heat Inactivation of the Middle  
340 East Respiratory Syndrome Coronavirus. *Influenza and Other Respiratory Viruses* **8** (2014).
- 341 19. Pagat, A.-M. *et al.* Evaluation of SARS-Coronavirus Decontamination Procedures. *Applied*  
342 *Biosafety* **12**, 100–108 (2007).

- 343 20. Laude, H. Thermal Inactivation Studies of a Coronavirus, Transmissible Gastroenteritis Virus.  
344 *The Journal of General Virology* **56**, 235–240 (1981).
- 345 21. Pratelli, A. Canine Coronavirus Inactivation with Physical and Chemical Agents.  
346 *The Veterinary Journal* **177**, 71–79 (2008).
- 347 22. Duan, S.-M. *et al.* Stability of SARS Coronavirus in Human Specimens and Environment and  
348 Its Sensitivity to Heating and UV Irradiation. *Biomedical and Environmental Sciences* **16**,  
349 246–255 (2003).
- 350 23. Abu-Aisha, H. *et al.* The Effect of Chemical and Heat Disinfection of the Hemodialysis  
351 Machines on the Spread of Hepatitis c Virus Infection: A Prospective Study. *Saudi Journal of*  
352 *Kidney Diseases and Transplantation* **6**, 174 (1995).
- 353 24. Jeong, E. K., Bae, J. E. & Kim, I. S. Inactivation of Influenza A Virus H1N1 by Disinfection  
354 Process. *American Journal of Infection Control* **38**, 354–360 (2010).
- 355 25. Eterpi, M., McDonnell, G. & Thomas, V. Disinfection Efficacy against Parvoviruses Compared  
356 with Reference Viruses. *Journal of Hospital Infection* **73**, 64–70 (2009).
- 357 26. World Health Organization. *Guidelines on Sterilization and Disinfection Methods Effective*  
358 *against Human Immunodeficiency Virus (HIV)* tech. rep. (1989).
- 359 27. Morris, D. H. *et al.* Mechanistic theory predicts the effects of temperature and humidity on  
360 inactivation of SARS-CoV-2 and other enveloped viruses. *Elife* **10**, e65902 (2021).
- 361 28. Chin, A. W. H. *et al.* Stability of SARS-CoV-2 in Different Environmental Conditions. *The*  
362 *Lancet Microbe* **1**, e10 (2020).
- 363 29. Yang, W. & Marr, L. C. Mechanisms by Which Ambient Humidity May Affect Viruses in  
364 Aerosols. *Applied and Environmental Microbiology* **78**, 6781–6788 (2012).
- 365 30. Rockey, N. *et al.* Humidity and Deposition Solution Play a Critical Role in Virus Inactivation  
366 by Heat Treatment of N95 Respirators. *Mosphere* **5** (2020).



- 367 31. Yang, W., Elankumaran, S. & Marr, L. C. Relationship between Humidity and Influenza a  
368 Viability in Droplets and Implications for Influenza's Seasonality. *PLoS ONE* **7** (2012).
- 369 32. Benbough, J. E. Some Factors Affecting the Survival of Airborne Viruses. *The Journal of*  
370 *General Virology* **10**, 209–220 (1971).
- 371 33. Lin, K., Schulte, C. R. & Marr, L. C. Survival of MS2 and  $\Phi$ 6 viruses in droplets as a function of  
372 relative humidity, pH, and salt, protein, and surfactant concentrations. *Plos one* **15**,  
373 e0243505 (2020).
- 374 34. Firquet, S. *et al.* Survival of enveloped and non-enveloped viruses on inanimate surfaces.  
375 *Microbes and environments*, ME14145 (2015).
- 376 35. Tuladhar, E., Bouwknecht, M., Zwietering, M., Koopmans, M. & Duizer, E. Thermal stability of  
377 structurally different viruses with proven or potential relevance to food safety. *Journal of*  
378 *applied microbiology* **112**, 1050–1057 (2012).
- 379 36. Estep, T. N., Bechtel, M. K., Miller, T. J. & Bagdasarian, A. Virus Inactivation in Hemoglobin  
380 Solutions by Heat. *Biomaterials, Artificial Cells and Artificial Organs* **16**, 129–134 (1988).
- 381 37. Gertsman, S. *et al.* Microwave- and Heat-Based Decontamination of N95 Filtering Facepiece  
382 Respirators: A Systematic Review. *Open Science Framewor* (2020).
- 383 38. Hulst, M. M. *et al.* Study on Inactivation of Porcine Epidemic Diarrhoea Virus,  
384 Porcine Sapelovirus 1 and Adenovirus in the Production and Storage of Laboratory Spray-  
385 Dried Porcine Plasma. *Journal of Applied Microbiology* **126**, 1931–1943 (2019).
- 386 39. Chan, K.-H. *et al.* Factors Affecting Stability and Infectivity of SARS-CoV-2. *Journal of Hospital*  
387 *Infection* **106**, 226–231 (2020).
- 388 40. Darnell, M. E. R., Subbarao, K., Feinstone, S. M. & Taylor, D. R. Inactivation of the Coronavirus  
389 That Induces Severe Acute Respiratory Syndrome, SARS-CoV. *Journal of Virological Methods*  
390 **121**, 85–91 (2004).

- 391 41. Gundy, P. M., Gerba, C. P. & Pepper, I. L. Survival of Coronaviruses in Water and Wastewater.  
392 *Food and Environmental Virology* **1** (2009).
- 393 42. Kariwa, H., Fujii, N. & Takashima, K. Inactivation of SARS Coronavirus by Means of  
394 Povidone-Iodine, Physical Conditions and Chemical Reagents. *Dermatology* **212**, 119–123  
395 (2006).
- 396 43. Kim, Y.-I. *et al.* Development of Severe Acute Respiratory Syndrome Coronavirus 2 (SARS-  
397 CoV-2) Thermal Inactivation Method with Preservation of Diagnostic Sensitivity. *Journal of*  
398 *Microbiology* **58**, 886–891 (2020).
- 399 44. Pujols, J. & Segal'es, J. Survivability of Porcine Epidemic Diarrhea Virus (PEDV) in Bovine  
400 Plasma Submitted to Spray Drying Processing and Held at Different Time by Temperature  
401 Storage Conditions. *Veterinary microbiology* **174**, 427–432 (2014).
- 402 45. Saknimit, M., Inatsuki, I., Sugiyama, Y. & Yagami, K. Virucidal Efficacy of Physico-Chemical  
403 Treatments against Coronaviruses and Parvoviruses of Laboratory Animals. *Experimental*  
404 *Animals* **37**, 341–345 (1988).
- 405 46. Chan, K. H. *et al.* The Effects of Temperature and Relative Humidity on the Viability of the  
406 SARS Coronavirus. *Advances in Virology* **2011**, 1–7 (2011).
- 407 47. Thomas, P. R. *et al.* Evaluation of Time and Temperature Sufficient to Inactivate Porcine  
408 Epidemic Diarrhea Virus in Swine Feces on Metal Surfaces. *Journal of Swine Health and*  
409 *Production* **23**, 84 (2015).
- 410 48. Hofmann, M. & Wyler, R. Quantitation, Biological and Physicochemical Properties of Cell  
411 Culture-Adapted Porcine Epidemic Diarrhea Coronavirus (PEDV). *Veterinary microbiology*  
412 **20**, 131–142 (1989).
- 413 49. Unger, S. *et al.* Holder Pasteurization of Donor Breast Milk Can Inactivate SARS-  
414 CoV-2. *Canadian Medical Association Journal* **192**, E1657–E1661 (2020).

- 415 50. Batéjat, C., Grassin, Q., Manuguerra, J.-C. & Leclercq, I. Heat Inactivation of the Severe Acute  
416 Respiratory Syndrome Coronavirus 2. *bioRxiv*, 2020.05.01.067769 (2020).
- 417 51. van Doremalen, N., Bushmaker, T. & Munster, V. Stability of Middle East Respiratory  
418 Syndrome Coronavirus (MERS-CoV) under Different Environmental Conditions.  
419 *Eurosurveillance* **18**, 20590 (2013).
- 420 52. Riddell, S., Goldie, S., Hill, A., Eagles, D. & Drew, T. W. The Effect of Temperature on  
421 Persistence of SARS-CoV-2 on Common Surfaces. *Virology Journal* **17** (2020).
- 422 53. Daeschler, S. C. *et al.* Effect of Moist Heat Reprocessing of N95 Respirators on SARS-CoV-2  
423 Inactivation and Respirator Function. *CMAJ* **192**, E1189–E1197 (2020).
- 424 54. Biryukov, J. *et al.* Increasing Temperature and Relative Humidity Accelerates Inactivation of  
425 SARS-CoV-2 on Surfaces. *mSphere* **5** (2020).
- 426 55. Mullis, L., Saif, L. J., Zhang, Y., Zhang, X. & Azevedo, M. S. Stability of Bovine Coronavirus on  
427 Lettuce Surfaces under Household Refrigeration Conditions. *Food Microbiology* **30**, 180–186  
428 (2012).
- 429 56. Guionie, O. *et al.* An Experimental Study of the Survival of Turkey Coronavirus at Room  
430 Temperature and +4°C. *Avian Pathology* **42**, 248–252 (2013).
- 431 57. Casanova, L., Rutala, W. A., Weber, D. J. & Sobsey, M. D. Survival of Surrogate Coronaviruses  
432 in Water. *Water Research* **43**, 1893–1898 (2009).
- 433 58. Casanova, L. M., Jeon, S., Rutala, W. A., Weber, D. J. & Sobsey, M. D. Effects of Air Temperature  
434 and Relative Humidity on Coronavirus Survival on Surfaces. *Applied and*  
435 *Environmental Microbiology* **76**, 2712–2717 (2010).
- 436 59. Teytelman, L., Stoliartchouk, A., Kindler, L. & Hurwitz, B. L. Protocols. io: virtual  
437 communities for protocol development and discussion. *PLoS Biology* **14**, e1002538 (2016).

- 438 60. Posada, J., Redrow, J. & Celik, I. A Mathematical Model for Predicting the Viability of  
439 Airborne Viruses. *Journal of Virological Methods* **164**, 88–95 (2010).
- 440 61. Lofgren, E., Fefferman, N. H., Naumov, Y. N., Gorski, J. & Naumova, E. N. Influenza  
441 Seasonality: Underlying Causes and Modeling Theories. *Journal of Virology* **81**, 5429– 5436  
442 (2007).
- 443 62. Holshue, M. L. *et al.* First Case of 2019 Novel Coronavirus in the United States. *New*  
444 *England Journal of Medicine* **382**, 929–936 (2020).
- 445 63. Tennant, B. J., Gaskell, R. M. & Gaskell, C. J. Studies on the Survival of Canine Coronavirus  
446 under Different Environmental Conditions. *Veterinary Microbiology* **42**, 255–259 (1994).
- 447 64. Fischer, R. *et al.* Ebola virus stability on surfaces and in fluids in simulated outbreak  
448 environments. *Emerging infectious diseases* **21**, 1243 (2015).
- 449 65. Brownie, C. *et al.* Estimating Viral Titres in Solutions with Low Viral Loads. *Biologicals* **39**,  
450 224–230 (2011).
- 451 66. Gelman, A. *et al.* *Bayesian Data Analysis, Third Edition* (CRC Press, 2013).
- 452 67. Carpenter, B. *et al.* Stan: A Probabilistic Programming Language. *Journal of statistical*  
453 *software* **76** (2017).
- 454 68. Gamble, A. *et al.* Data from “Heat-treated virus inactivation rate depends strongly on  
455 treatment procedure: illustration with SARS-CoV-2” [https://github.com/dylanhmorris/heat-](https://github.com/dylanhmorris/heat-inactivation)  
456 [inactivation](https://github.com/dylanhmorris/heat-inactivation).
- 457 69. Kay, M., Kola, T., Hullman, J. R. & Munson, S. A. *When (ish) is my bus? user-centered*  
458 *visualizations of uncertainty in everyday, mobile predictive systems* in *Proceedings of the 2016*  
459 *CHI Conference on Human Factors in Computing Systems* (2016), 5092–5103.

460 **Table 1.** Half-life of SARS-CoV-2 in Dulbecco's Modified Eagle Medium cell culture medium  
461 exposed to 70°C heat under different procedures. Half-lives are calculated from the estimated  
462 exponential decay rates of virus titer and reported as posterior median and middle 95% credible  
463 interval.

| Procedure               | Median (min) | 2.5%  | 97.5%  |
|-------------------------|--------------|-------|--------|
| Uncovered plate, oven   | 37.04        | 12.65 | 869.82 |
| Covered plate, oven     | 3.94         | 3.12  | 5.01   |
| Closed vial, oven       | 0.91         | 0.10  | 1.99   |
| Closed vial, heat block | 0.86         | 0.09  | 1.77   |

464

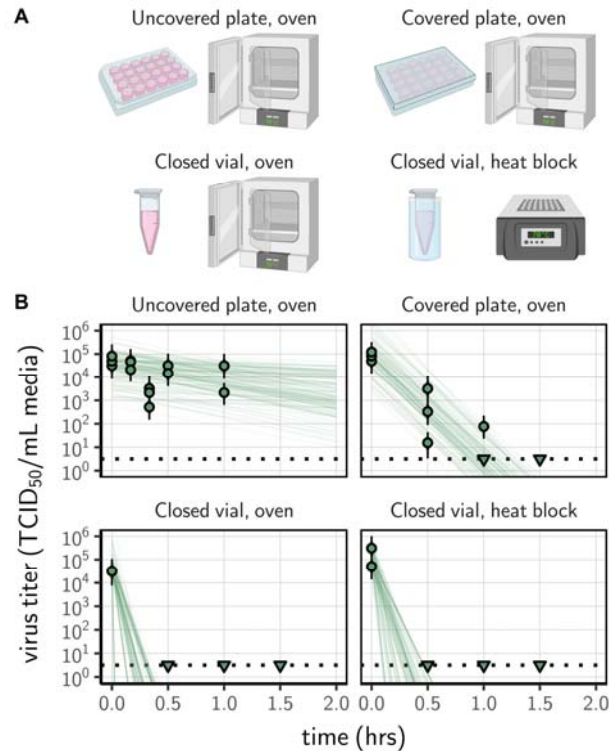

465

466 **Figure 1.** Inactivation of SARS-CoV-2 by heat treatment under different procedures. (A) A  
467 solution of SARS-CoV-2 was exposed to 70°C heat. Samples were placed in uncovered or covered  
468 24-well plates, or in closed 2 mL vial before heat treatment using a dry oven or a heat block  
469 containing water. (B) Samples were then collected at indicated time-points during heat treatment.  
470 Viable virus titer estimated by end-point titration is shown in TCID<sub>50</sub>/mL media on a logarithmic  
471 scale. Points show estimated titers for each collected sample; vertical bar shows a 95% credible  
472 interval. Time-points with no positive wells for any replicate are plotted as triangles at the  
473 approximate single-replicate detection limit of the assay (LOD; denoted by a black dotted line at  
474 10<sup>0.5</sup> TCID<sub>50</sub>/mL media) to indicate that a range of sub-LOD values are plausible. Lines show  
475 predicted decay of virus titer over time (10 random draws per data-point from the joint posterior  
476 distribution of the slope and intercept). Panel A created with [BioRender.com](https://www.biorender.com)

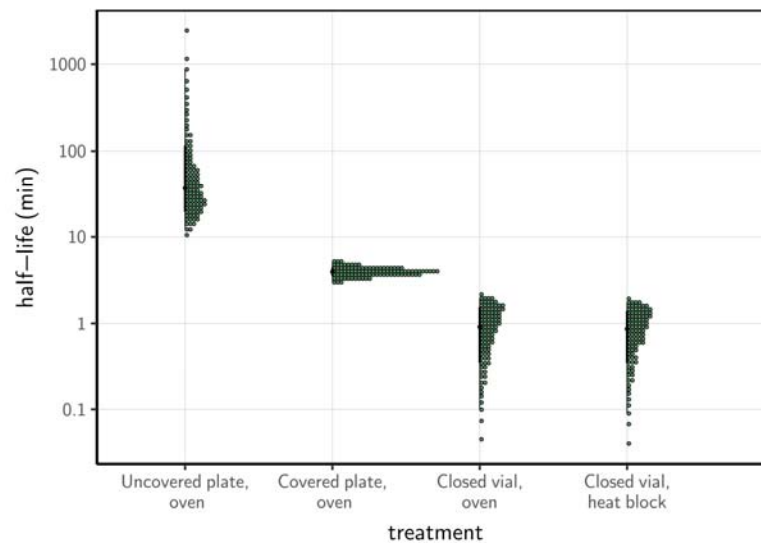

477

478 **Figure 2.** Half-life of SARS-CoV-2 in a solution exposed to 70°C heat under different procedures.  
479 Quantile dotplots [69] of the posterior distribution for half-life of viable virus under each different  
480 heat-treatment procedure. Half-lives were calculated from the estimated exponential decay rates  
481 of virus titer (Fig. 1B) and plotted on a logarithmic scale. For each distribution, the black dot  
482 shows the posterior median estimate and the black line shows the 95% credible interval.

**A**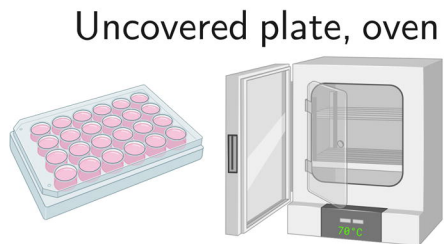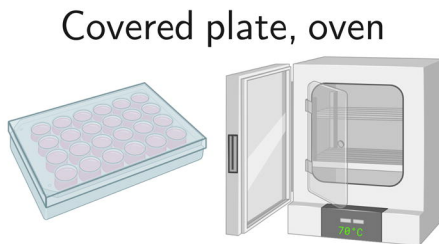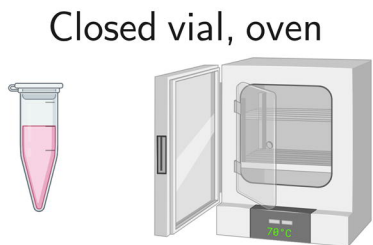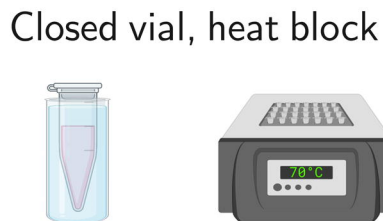**B**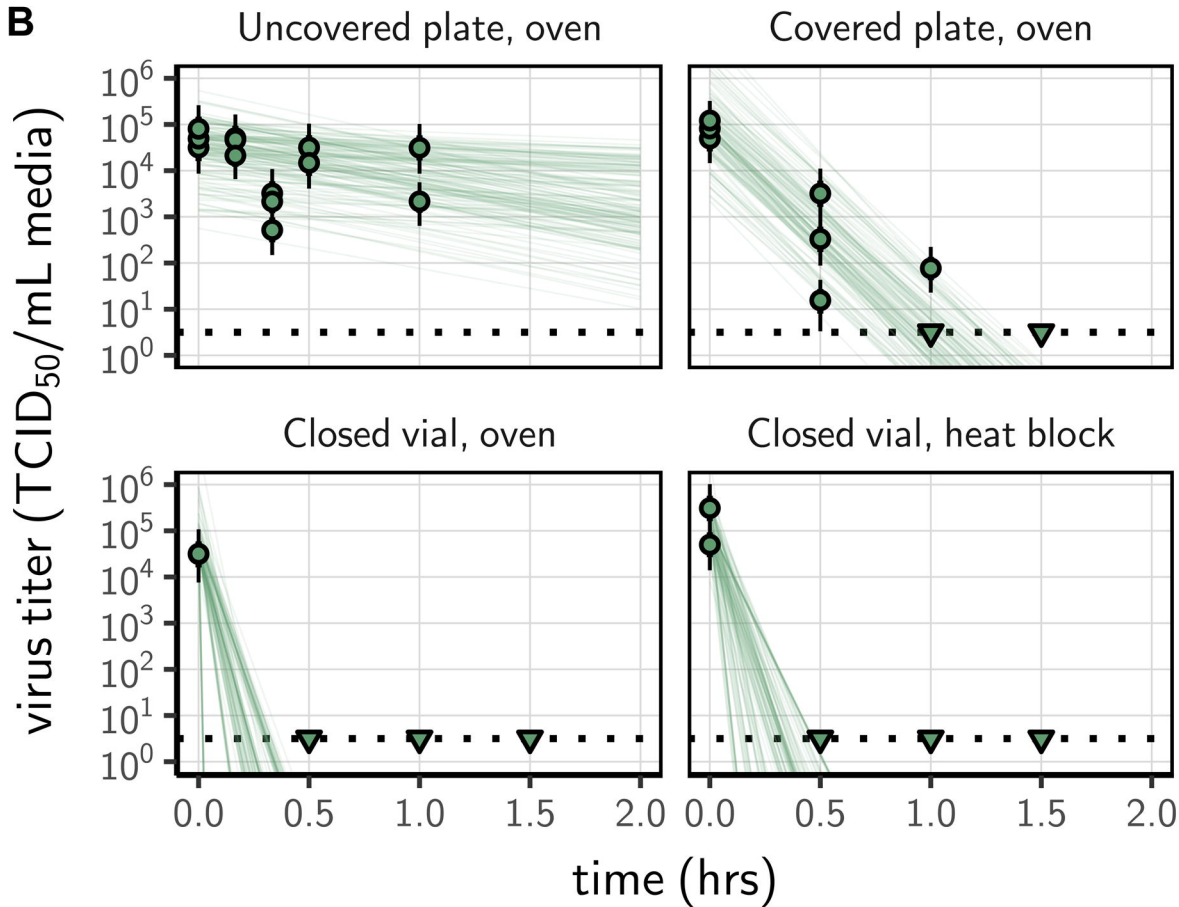



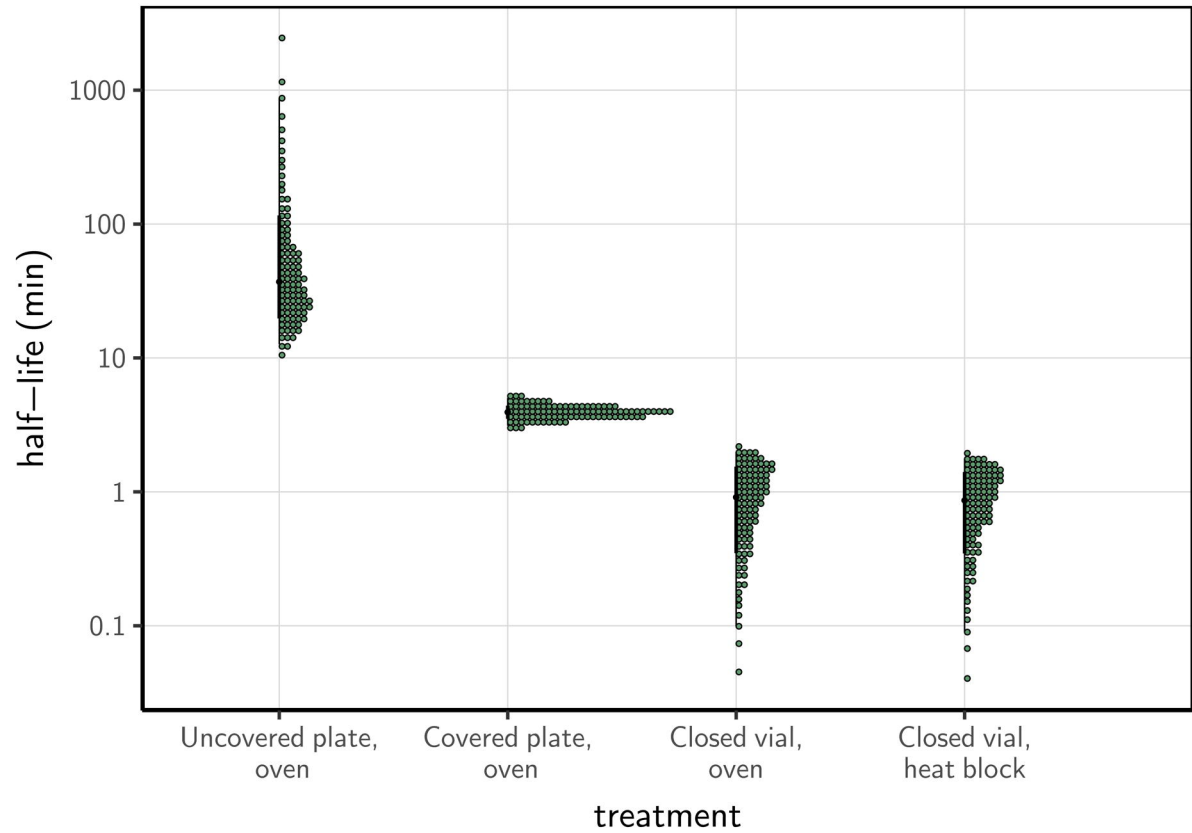

Source: https://www.biorxiv.org/content/10.1101/2020.08.10.242206v3.full.pdf
